# Supplementary material for: Anchoring Cu Species over SiO2 for Hydrogenation of Dimethyl Oxalate to Ethylene Glycol
Source: MDPI journal article supplement (doi:10.3390/catal12111326), 2022-10-28
Supplement: s1 [file s1]

# Anchoring Cu Species over SiO<sub>2</sub> for Hydrogenation of Dimethyl Oxalate to Ethylene Glycol

Xiaoguang San <sup>1</sup>, Xiaohui Gong <sup>1</sup>, Yiming Lu <sup>1</sup>, Juhua Xu <sup>2</sup>, Liming He <sup>2</sup>, Dan Meng <sup>1,\*</sup>,  
Guosheng Wang <sup>1</sup>, Jian Qi <sup>3,4,\*</sup> and Quan Jin <sup>2,\*</sup>

- <sup>1</sup> College of Chemical Engineering, Shenyang University of Chemical Technology, Shenyang 110142, China  
<sup>2</sup> Key Laboratory of Automobile Materials (Ministry of Education), School of Materials Science and Engineering, Jilin University, Changchun 130022, China  
<sup>3</sup> State Key Laboratory of Biochemical Engineering, Institute of Process Engineering, Chinese Academy of Sciences, 1 North 2nd Street, Zhongguancun, Haidian District, Beijing 100190, China  
<sup>4</sup> School of Chemical Engineering, University of Chinese Academy of Sciences, Beijing 100049, China  
 \* Correspondence: mengdan0610@hotmail.com (D.M.); jqj@ipe.ac.cn (J.Q.); qjin@jlu.edu.cn (Q.J.)

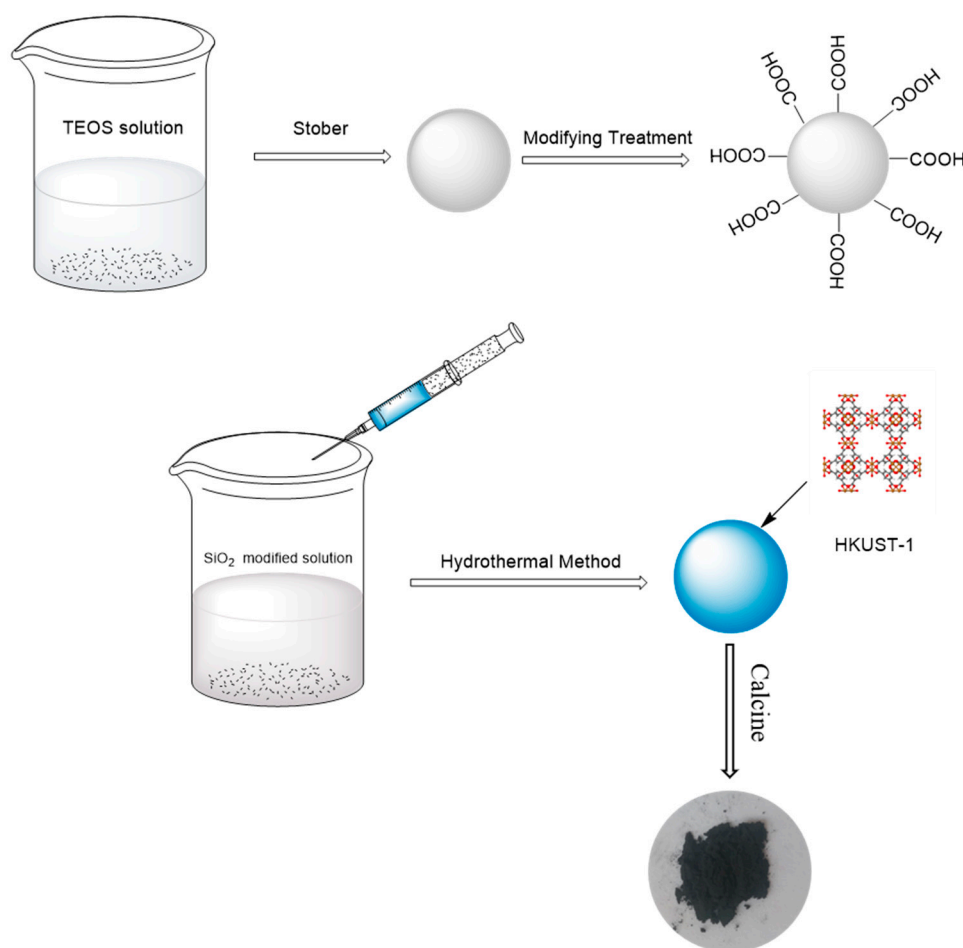

Figure S1. Diagram of catalyst preparation process

Table S1 Kinetic energy and Cu<sup>+</sup> ratio in different catalysts

| Catalysts | K.E. (eV) <sup>a</sup> | B.E. of | X <sub>Cu<sup>+</sup></sub> (%) <sup>b</sup> |
|-----------|------------------------|---------|----------------------------------------------|
|-----------|------------------------|---------|----------------------------------------------|

|                                | Cu <sup>+</sup> | Cu <sup>0</sup> | Cu2p <sub>3/2</sub> (eV) |      |
|--------------------------------|-----------------|-----------------|--------------------------|------|
| MOF-CmS                        | 914             | 918             | 933.3                    | 74.8 |
| CS                             | 914             | 917             | 933.0                    | 61.6 |
| MOF-CS                         | 914             | 918             | 933.3                    | 63.3 |
| Cu <sub>2</sub> O <sup>c</sup> | 913.6           | /               | 932.5                    | /    |
| Cu <sup>c</sup>                | /               | 918.3           | 932.7                    | /    |

<sup>a</sup> Kinetic energy from Cu LMM peak.

<sup>b</sup> Intensity ratio between Cu<sup>+</sup> and (Cu<sup>+</sup>+Cu<sup>0</sup>) by deconvolution of Cu LMM XAES.

<sup>c</sup> The XPS data of bulk Cu<sub>2</sub>O and Cu were also collected by the ESCALAB250 equipment from ref.<sup>[1]</sup>

**Table S2** Catalytic performance of MOF-CmS, CS and MOF-CS samples at 200 °C with WLHSV<sub>DMO</sub>= 0.82 h<sup>-1</sup>.

| Reaction T = 200 °C |                      |                      |                      |                      |                          |
|---------------------|----------------------|----------------------|----------------------|----------------------|--------------------------|
| Catalysts           | WLHSV <sub>DMO</sub> | Conv. <sub>DMO</sub> | Selec. <sub>EG</sub> | Selec. <sub>MG</sub> | Selec. <sub>others</sub> |
|                     | /h <sup>-1</sup>     | /%                   | /%                   | /%                   | /%                       |
| MOF-CmS             | 0.82                 | 100                  | 98.1                 | 1                    | 0.9                      |
| CS                  | 0.82                 | 86.9                 | 49.7                 | 48.6                 | 1.65                     |
| MOF-CS              | 0.82                 | 68.4                 | 41.7                 | 57.3                 | 1.0                      |

**Table S3** Physicochemical properties of different catalysts

| Catalysts | Cu precursor | Cu loading (wt%) <sup>a</sup> | Surface Area (m <sup>2</sup> g <sup>-1</sup> ) | S <sub>Cu</sub> (m <sup>2</sup> g <sup>-1</sup> ) <sup>b</sup> | Cu dispersion (%) <sup>b</sup> | Colour |
|-----------|--------------|-------------------------------|------------------------------------------------|----------------------------------------------------------------|--------------------------------|--------|
|-----------|--------------|-------------------------------|------------------------------------------------|----------------------------------------------------------------|--------------------------------|--------|

|                  |                      |       |     |      |      |            |
|------------------|----------------------|-------|-----|------|------|------------|
| HKUST-1          | Cu(OAc) <sub>2</sub> | 21.21 | 336 | /    | /    | blue       |
| SiO <sub>2</sub> | /                    | /     | 89  | /    | /    | white      |
| MOF-CmS          | HKUST-1              | 13    | 154 | 41.7 | 49.4 | clear blue |
| CS               | Cu(OAc) <sub>2</sub> | 17    | 70  | 12   | 10.8 | dark grey  |
| MOF-CS           | HKUST-1              | 10    | 110 | 15   | 23.1 | clear blue |

<sup>a</sup>Cu loading obtained from ICP-OES.

<sup>b</sup>Cu metallic surface area and dispersion collected by N<sub>2</sub>O titration.

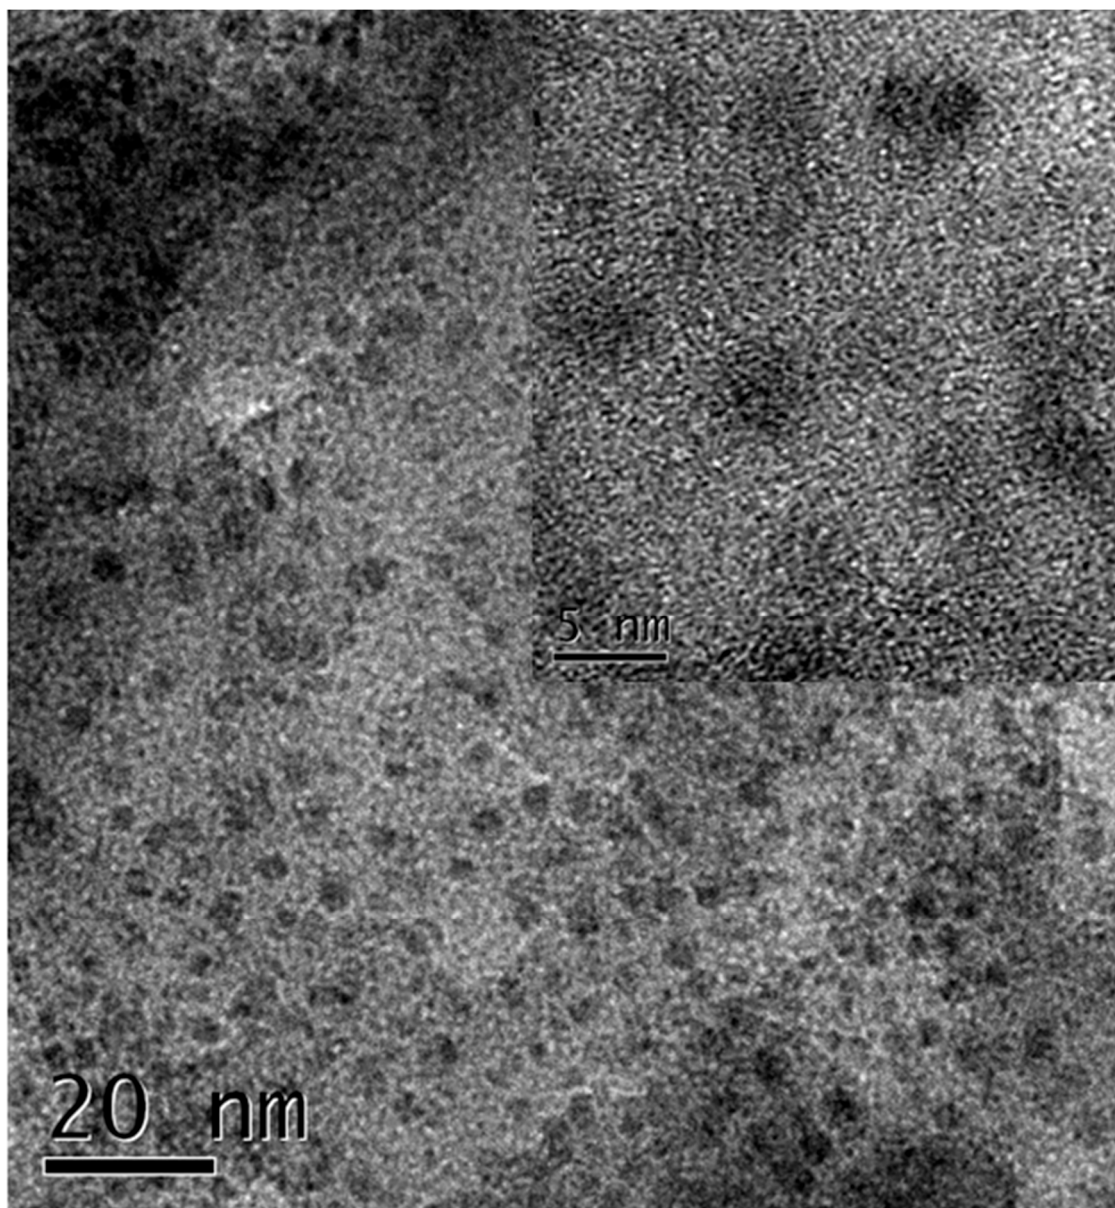

**Figure S2.** TEM images of the MOF-CmS catalyst

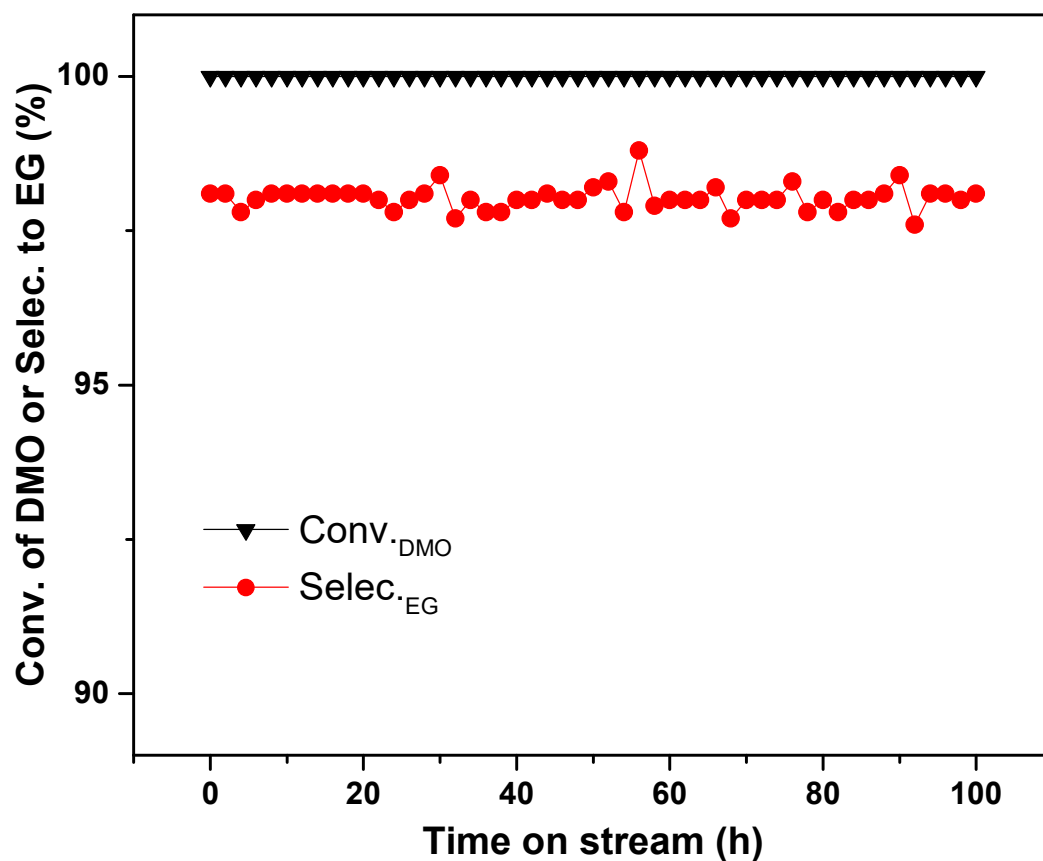

Figure S3. Long-term stability test of MOF-CmS sample at reaction temperature of 200 °C and  $\text{WLHSV}_{\text{DMO}}$  of 0.82  $\text{h}^{-1}$ .

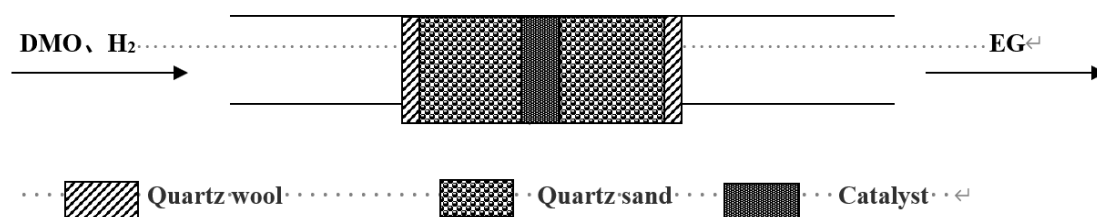

Figure S4. Reaction tube diagram

#### Reference

- [1] Li, X.L.; Xie, F.Y.; Gong, L.; Zhang, W.H.; Yu, X.L.; Chen, J. Effect of argon ion bombardment on copper oxide studied by X-ray photoelectron spectroscopy. *J. Instrumental Anal.* **2013**, *32*, 535–540.
